# Supplementary material for: Evaluation of Linkers’ Influence on Peptide-Based Piezoelectric Biosensors’ Sensitivity to Aldehydes in the Gas Phase
Source: MDPI journal article supplement (doi:10.3390/ijms241310610), 2023-06-25
Supplement: s1 [file s1]

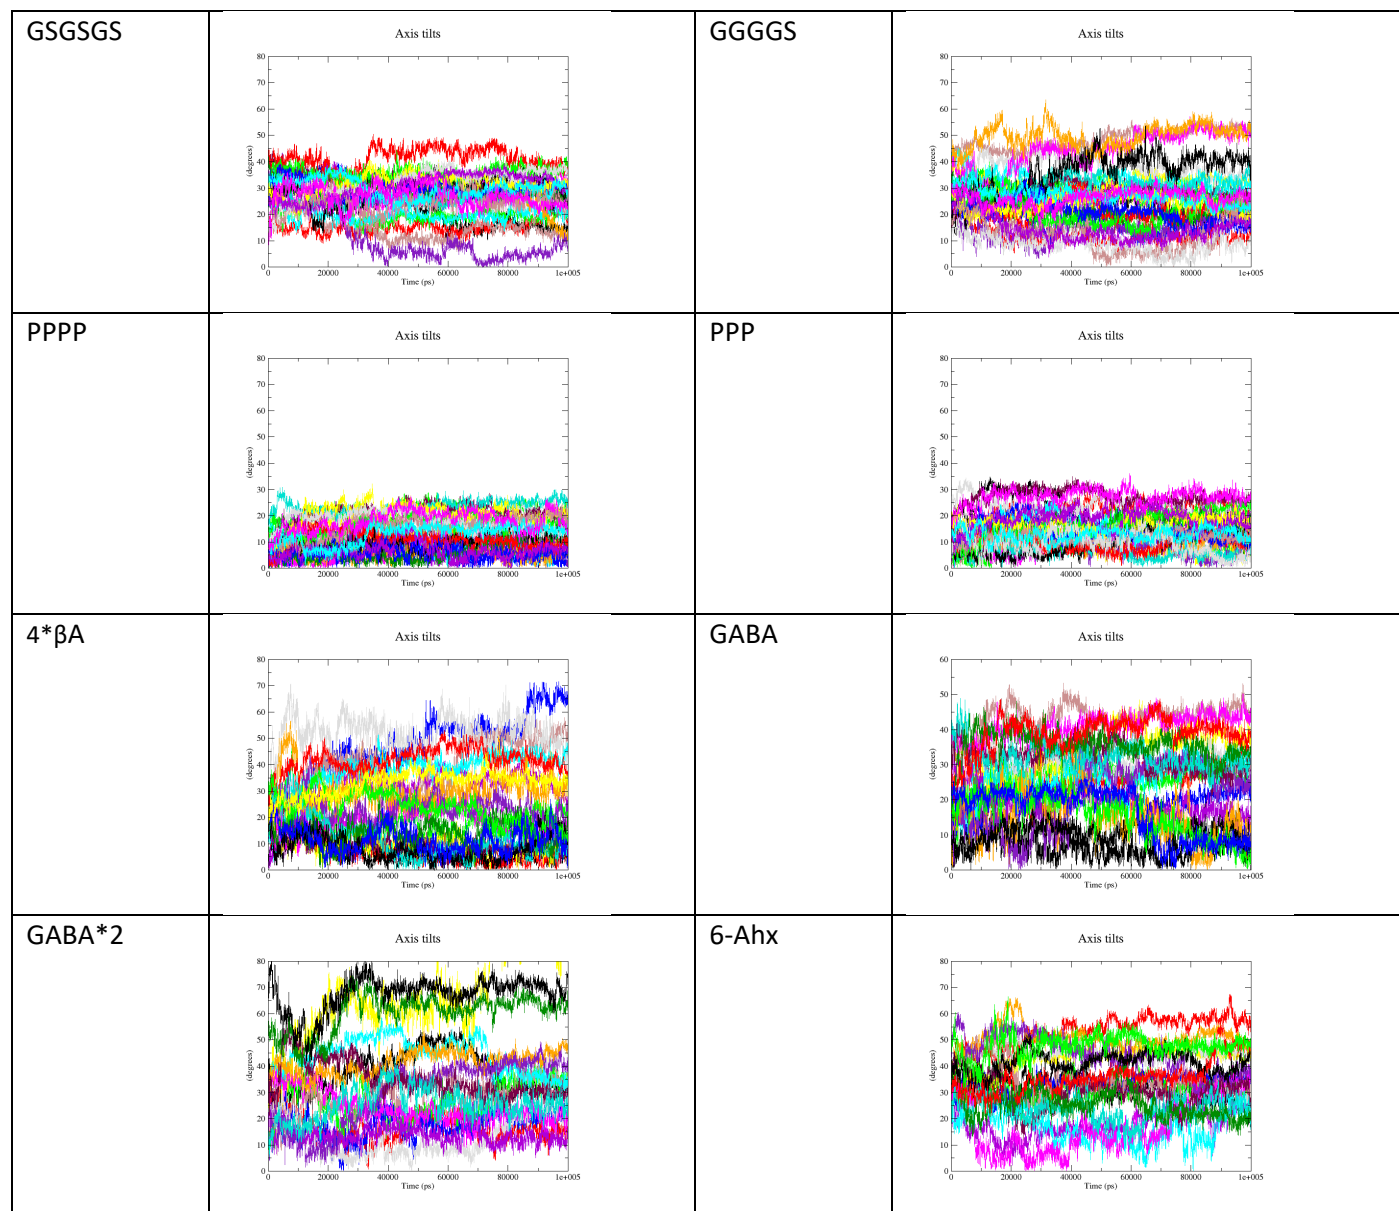

**Figure S1.** The charts represent the change in helix axis tilt of peptides during a 100 ns molecular dynamics simulation for peptides with different linkers.

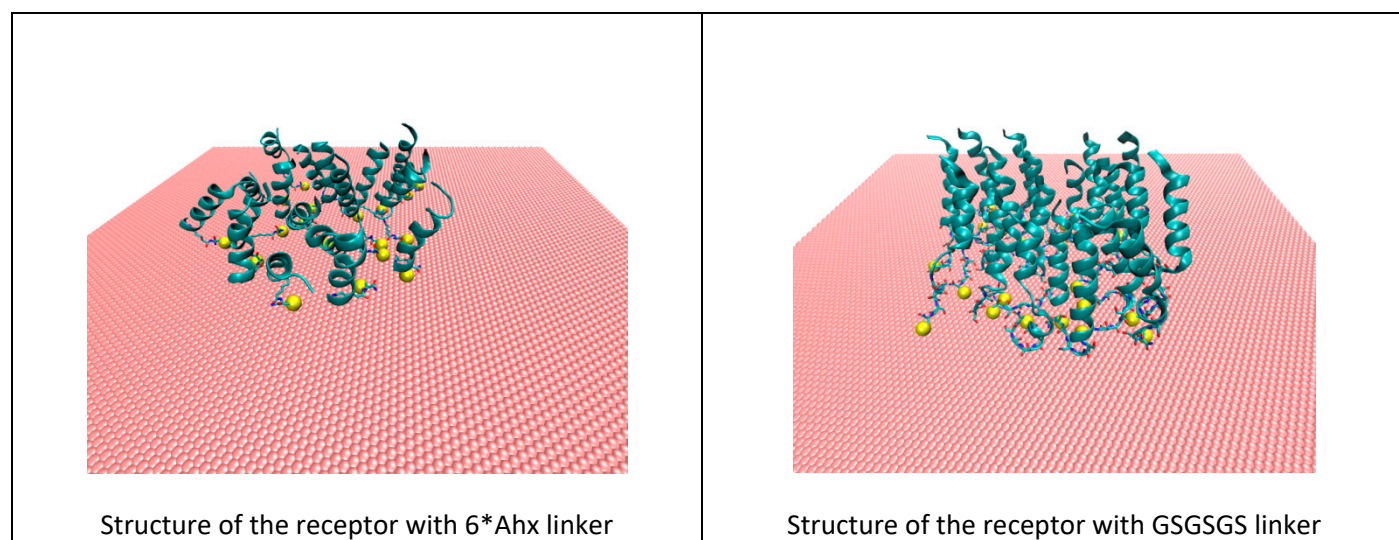

**Figure S2.** Representative structures of receptors from both groups (proteogenic and non-proteogenic).

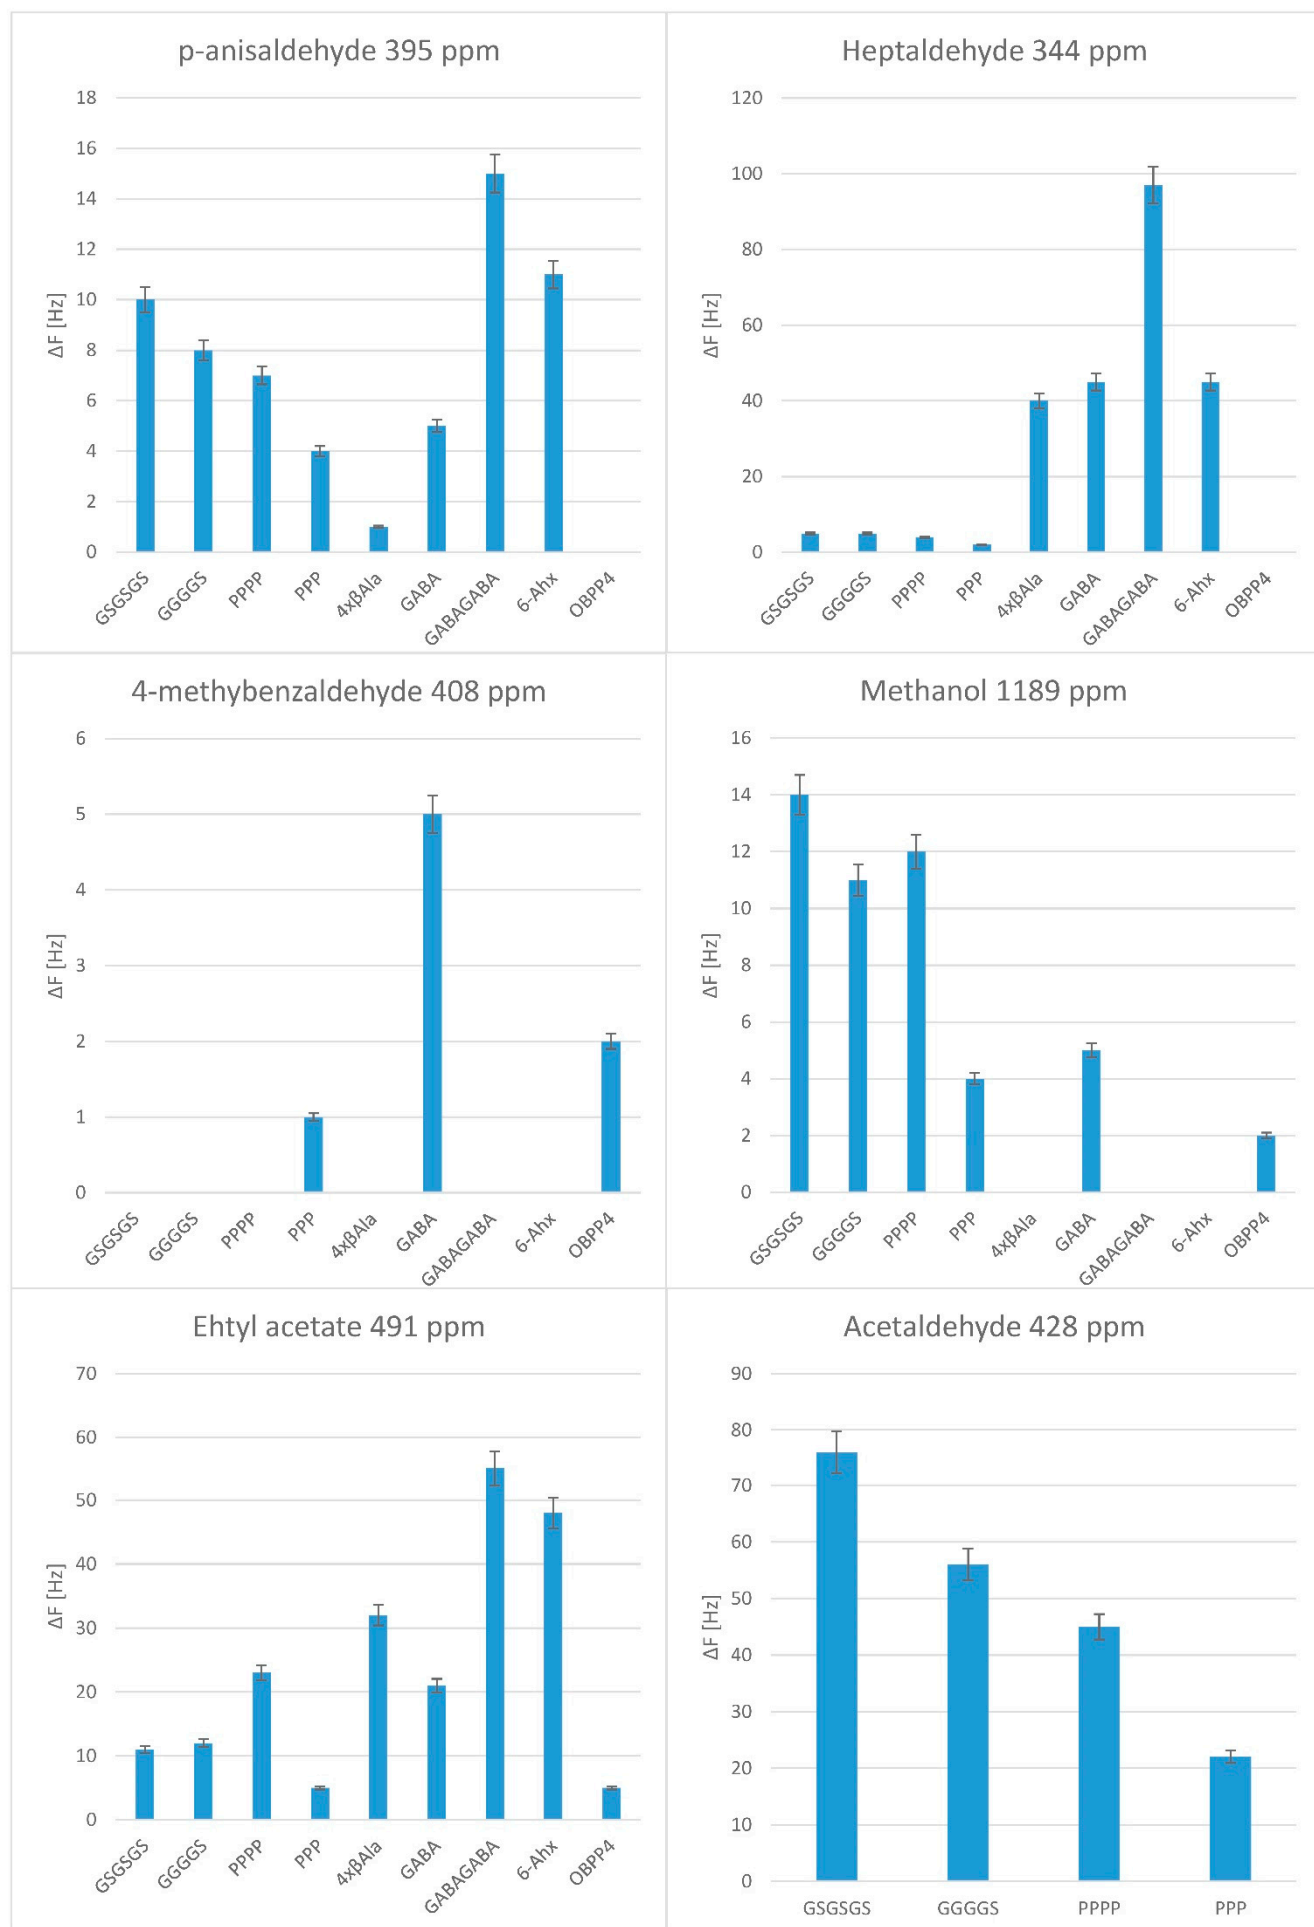

**Figure S3.** The changes of resonance frequencies ( $\Delta F$ ) in the presence of different gaseous compounds.
